# Supplementary material for: Neurophysiological Defects and Neuronal Gene Deregulation in Drosophila mir-124 Mutants
Source: PLOS journal article supplement (doi:10.1371/journal.pgen.1002515), 2012-02-09
Supplement: S5 (10.1371/journal.pgen.1002515.s005) [file journal.pgen.1002515.s005]

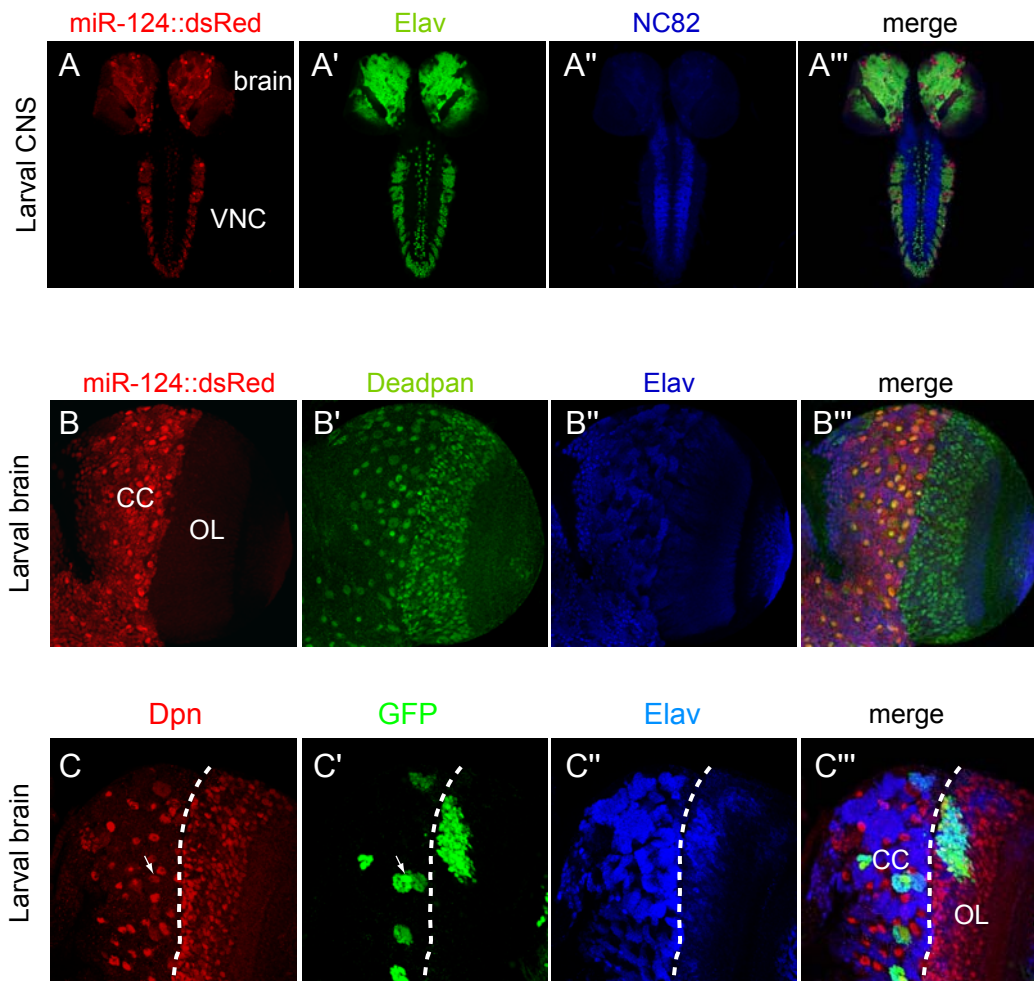

Supplementary Figure 5. Expression of the miR-124:dsRed reporter in larval CNS. (A-A''') Colabeling of miR-124:dsRed reporter in larval CNS with Elav (marking neurons) and NC82 (marking neuropile) in a single confocal slice. miR-124:dsRed is active in the brain and the ventral nerve cord (VNC).

(B-B''') Colabeling of the miR-124:dsRed in the brain with Deadpan (marking neuroblasts) and Elav. miR-124:dsRed is mostly active in the central complex, both in neuroblasts and neurons; it is expressed only weakly in the optic lobe. Shown is an overlay of dorsal brain z-sections.

(C-C''') MARCM analysis in control larval brain clones to mark the lineages produced by single neuroblasts. GFP+ clones maintain a single neuroblast (marked by large Dpn+ cells in red, arrows in C and C') and can generate multiple neurons (as marked by Elav in blue). Note that this is a relatively superficial cross-section and additional GFP-labeled neurons in the clones are located in deeper layers. OL, optic lobe; CC, central complex.
