# Supplementary material for: Neurophysiological Defects and Neuronal Gene Deregulation in Drosophila mir-124 Mutants
Source: PLOS journal article supplement (doi:10.1371/journal.pgen.1002515), 2012-02-09
Supplement: S7 (10.1371/journal.pgen.1002515.s007) [file journal.pgen.1002515.s007]

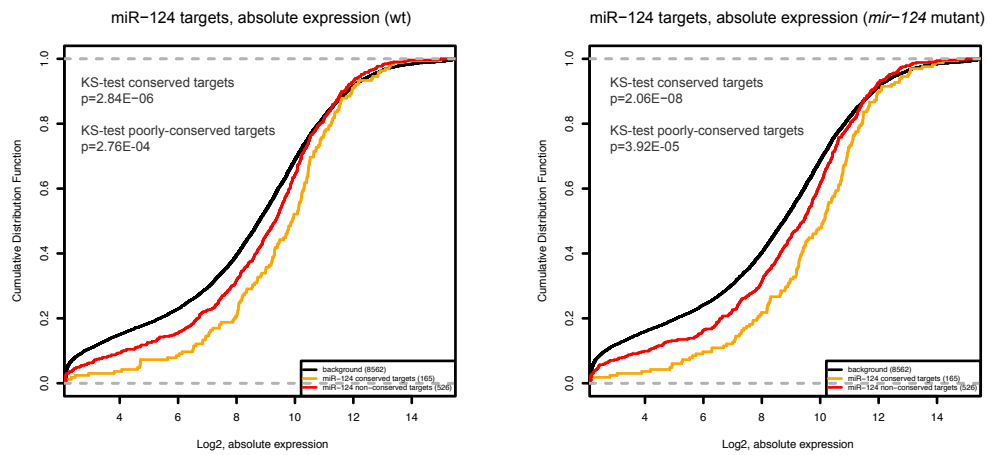

Supplementary Figure 7. Absolute expression of miR-124 target genes in miR-124:DsRed<sup>+</sup> cells. Left panel is the same as in main Figure 7B, indicating that both miR-124 well-conserved and poorly-conserved targets are expressed at relatively high levels in both wt and *mir-124* mutants.

Supplementary Figure 7  
Sun et al
